# Supplementary material for: Manufacturing a super-active carbon using fast pyrolysis char from biomass and correlation study on structural features and phenol adsorption
Source: Royal Society of Chemistry journal article supplement (doi:10.1039/c7ra06910c), 2017-01-01
Supplement: c7ra06910c1.pdf [file c7ra06910c1.pdf]

## Supporting Information

### **Manufacturing a super-active carbon using fast pyrolysis char from biomass and correlation study on structural features and phenol adsorption**

Hyewon Hwang<sup>a</sup>, Olga Sahin<sup>b</sup>, Joon Weon Choi<sup>c\*</sup>

<sup>a</sup> Department of Forest Sciences, Seoul National University, 599 Gwanak-ro, Gwanak-gu, Seoul, 08826, Korea

<sup>b</sup> Institute of Catalytic Research (IKFT), Karlsruhe Institute of Technology, Hermann-von-Helmholtz-Platz 1 76344 Eggenstein-Leopoldshafen, Germany

<sup>c</sup> Graduate School of International Agricultural Technology and Institute of Green-Bio Science and Technology, Seoul National University, Pyeongchang, Gangwon-do, 25354, Korea

**Table S1.** Characterization of biomass feedstock.

| Elemental analysis (wt%)* |   | Compositional analysis (wt%) |               |      | ICP-ES analysis (ppm by biomass) |        |    |       |
|---------------------------|---|------------------------------|---------------|------|----------------------------------|--------|----|-------|
| Yellow poplar             | C | 45.8                         |               |      |                                  |        |    |       |
|                           | H | 5.8                          | Holocellulose | 74.0 | K                                | 630.4  | P  | 101.2 |
|                           | O | 48.2                         | Lignin        | 30.0 | Mg                               | 170.4  | Si | 19.8  |
|                           | N | 0.2                          | Ash           | 0.45 | Ca                               | 908.6  | Fe | 35.1  |
| <hr/>                     |   |                              |               |      |                                  |        |    |       |
| Japanese red pine         | C | 50.7                         |               |      |                                  |        |    |       |
|                           | H | 6.1                          | Holocellulose | 73.6 | K                                | 721.0  | P  | 286.5 |
|                           | O | 43.2                         | Lignin        | 31.4 | Mg                               | 199.0  | Si | 96.9  |
|                           | N | 0.0                          | Ash           | 1.0  | Ca                               | 1481.7 | Fe | 96.5  |

\* Oxygen ratio was calculated by difference.

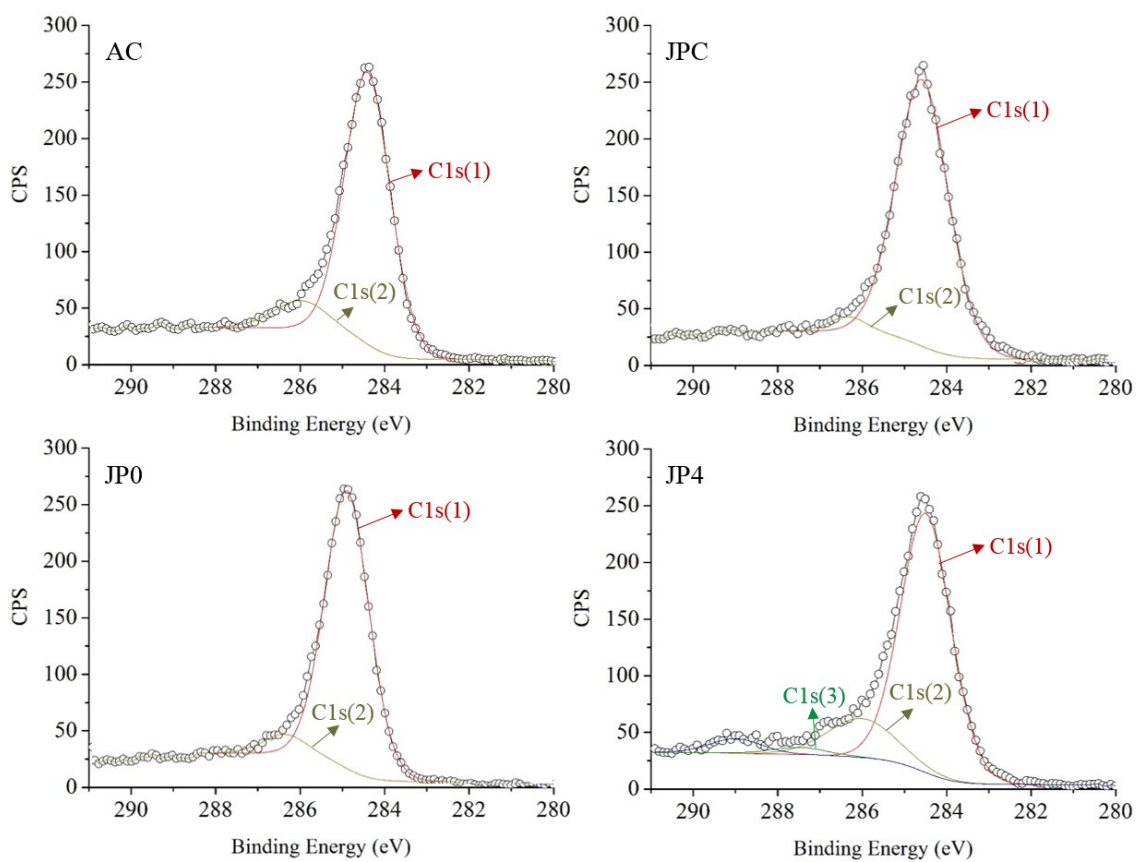

**Figure S1.** XPS scans of C1s photoelectron envelopment for feedstock and carbon products.

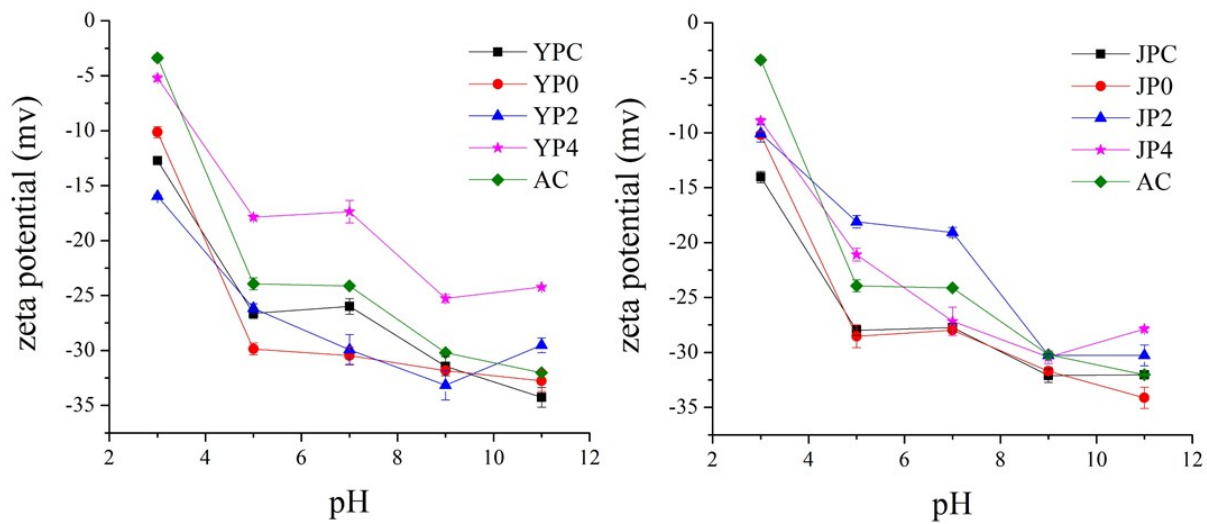

**Figure S2.** Zeta potential curves of carbon products at different pH.

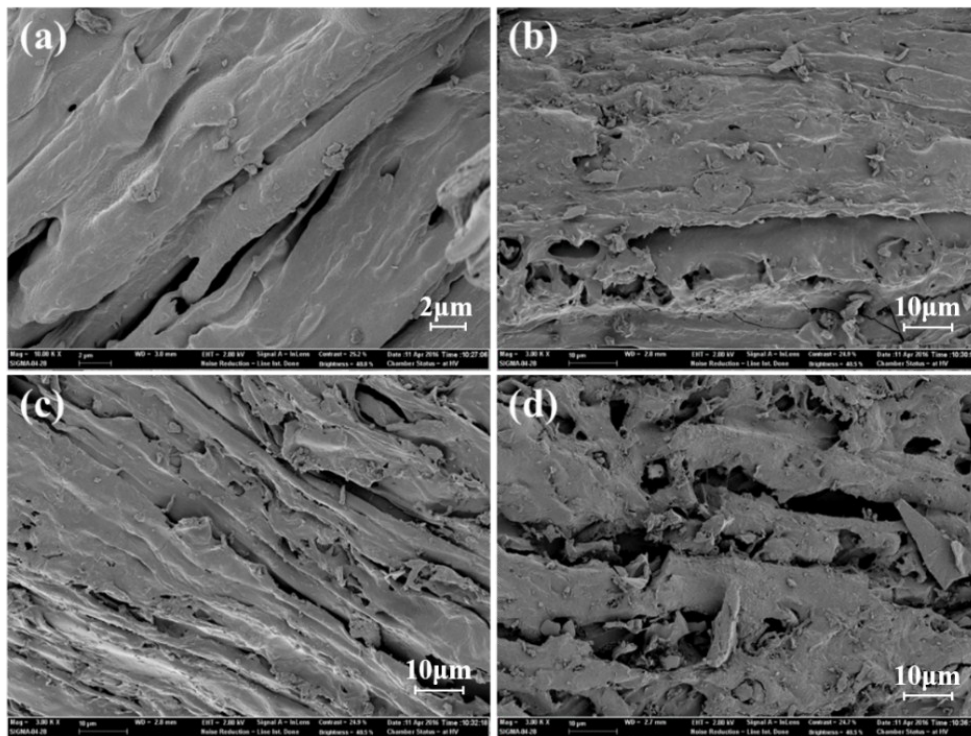

**Figure S3.** The morphological changes of pyrolysis char and activated carbon products ((a): YPC, (b): YP4, (c): JPC, (d): JP4).

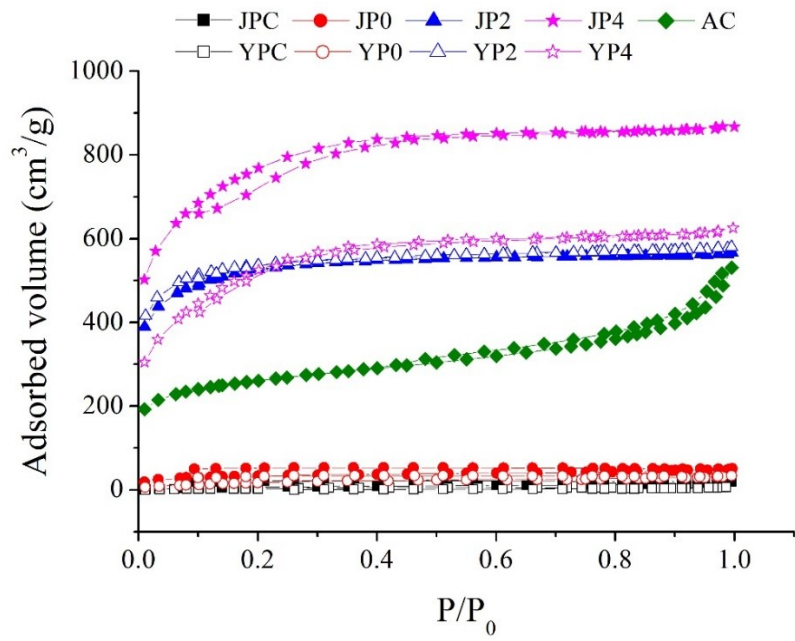

**Figure S4.** N<sub>2</sub> adsorption-desorption isotherms of the produced activated carbon and commercial activated carbon in this study.

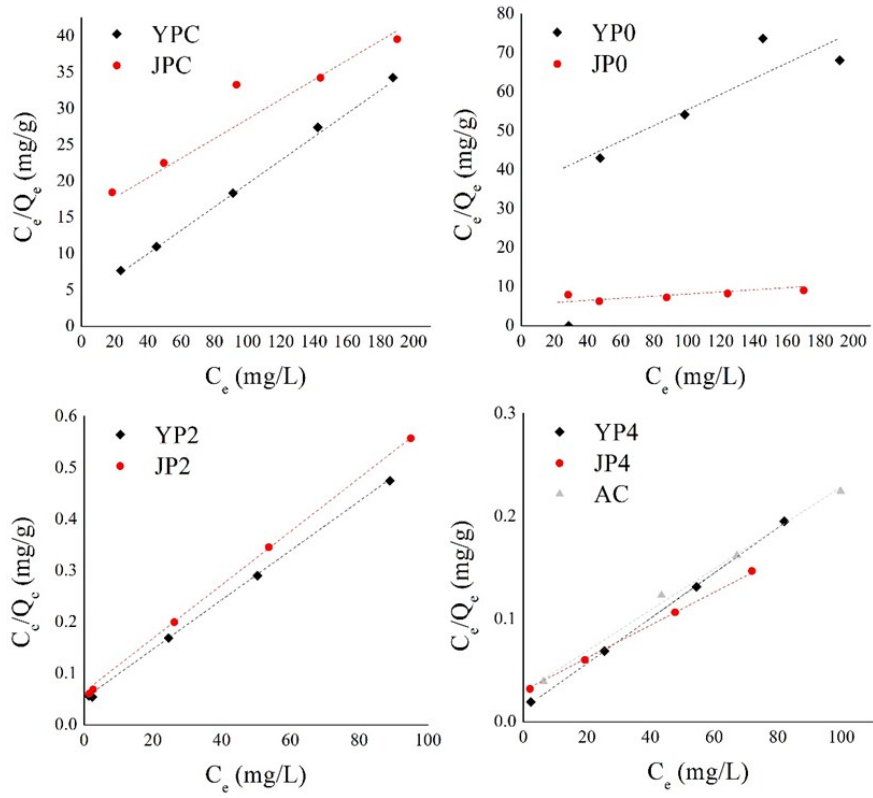

**Figure S5.** Adsorption isotherm for phenol onto activated carbon derived from fast pyrolysis char under different KOH ratios (The dotted line : Langmuir fits).
